# Supplementary material
Source: Springer Nature journal article supplement (https://www.springermedizin.de/resource/supplementary/12943_2014_1298_MOESM10_ESM.pdf/9553226)

A

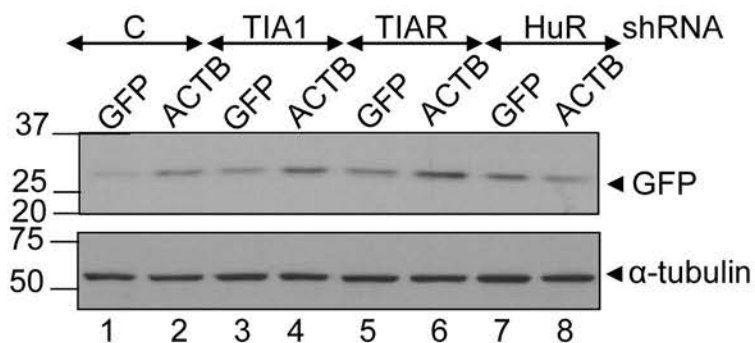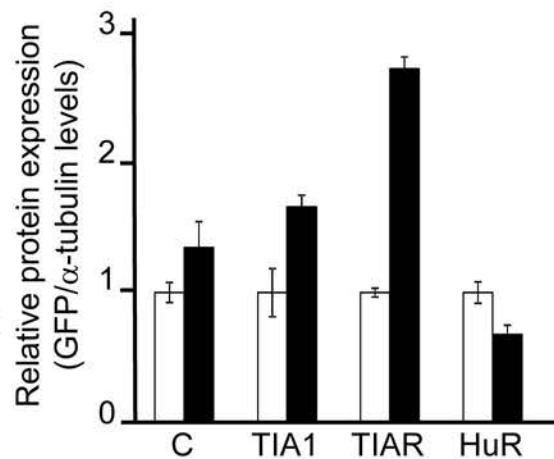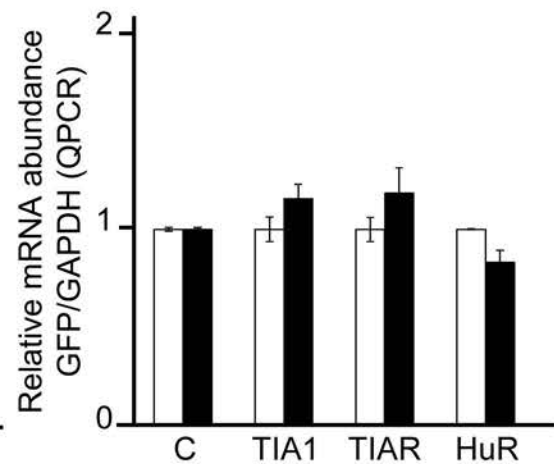

B

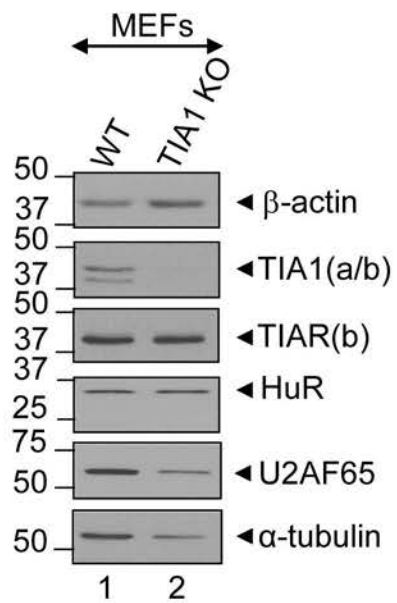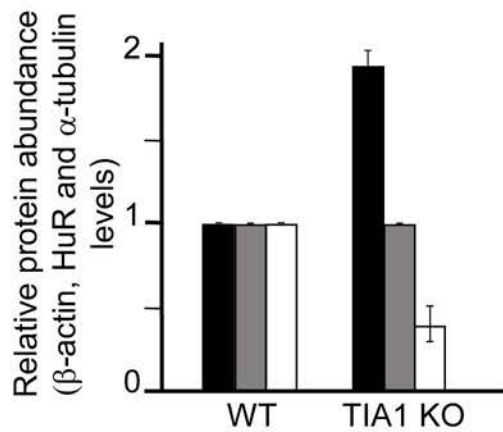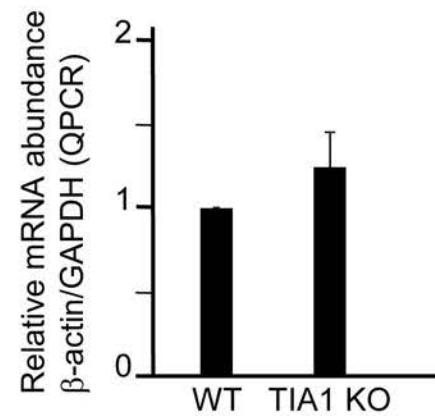

Supplement: MOESM10 [file 9553226]
